# Supplementary material for: Noncognitive Behavioral Changes Associated With Alzheimer’s Disease: Implications of Neuroimaging Findings
Source: Atypon-hosted journal article supplement (doi:10.1176/appi.neuropsych.16080155), 2017-09-06
Supplement: appi.neuropsych.16080155.ds001.pdf [file appi.neuropsych.16080155.ds001.pdf]

## Appendix

### **Inclusion criteria**

- a. Papers comparing images of AD patients with NCBCs vs. AD patient without NCBCs, or
- b. Papers comparing images of AD patients with NCBCs vs. normal controls, or
- c. Papers comparing prevalence or degree of severity of NCBCs in AD patients with different imaging results

### **Exclusion criteria**

- a. Reviews
- b. Case reports

### **Imaging methods**

- CT = Computed tomography
- MR = Magnetic resonance
- SPECT = Single photon emission computed tomography
- PET = Positron emission tomography

**Table S1**  
**Results of the systematic review: references identified and reviewed**

|                                      | Identified from Medline or PsychInfo (extracted from references) | Relevant based on inclusion/exclusion criteria |
|--------------------------------------|------------------------------------------------------------------|------------------------------------------------|
| Depression                           | 182 (5)                                                          | 21                                             |
| Psychosis                            | 117 (0)                                                          | 34                                             |
| Apathy                               | 80 (0)                                                           | 33                                             |
| Aggression, agitation, hyperactivity | 63 (22)                                                          | 8                                              |
| Anxiety                              | 41 (2)                                                           | 9                                              |
| Sleep disorders                      | 50 (12)                                                          | 2                                              |

**Table S2: Neuroimaging studies in Alzheimer's disease and depression  
Abbreviations for Tables S2A-C:**

**DEPRESSION SCALE**

Dep Scale = Depression Scale

NPI = Neuropsychiatric Inventory

HAM-D = Hamilton Depression Scale

CSDD = Cornell Scale for Depression in Dementia

NIMH AD = National Institute of Mental Health Alzheimer Dementia

DSM-IV = Diagnostic and Statistical Manual, 4<sup>th</sup> edition

MDD = Major Depressive Disorder

MDRS = Mattis Dementia Rating Scale

MMSE = Mini-mental State Examination

NEO-PI = NEO Personality Inventory for current depression

GDS = Geriatric Depression Scale

CES-D = Center for Epidemiologic Studies Depression Scale

ICD = International Statistical Classification of Diseases and Related Health Problems

MADRS = Montgomery Asberg Depression Rating Scale

DDES = Duke Depression Evaluation Scale

**METHOD**

SPECT = Single Photon Emission Computed Tomography

MRI = Magnetic Resonance Imaging

PET = Positron Emission Tomography

FDG-PET = 2-[<sup>18</sup>F]fluoro-2-deoxy-D-glucose (FDG)- Positron Emission Tomography

rCBF = regional Cerebral Blood Flow

fMRI = functional Magnetic Resonance Imaging

**SUBJECTS**

AD = Alzheimer's Disease

FTD = Fronto-temporal Dementia

VaD = Vascular Dementia

LBD = Lewey Body Dementia

**Table S2A**  
**SPECT and PET metabolism studies in Alzheimer's Disease and depression**

| <b>Source</b>              | <b>Dep Scale</b>  | <b>Method</b> | <b>Subjects</b>                                                             | <b>Findings</b>                                                                                                                                                                                                      |
|----------------------------|-------------------|---------------|-----------------------------------------------------------------------------|----------------------------------------------------------------------------------------------------------------------------------------------------------------------------------------------------------------------|
| Akiyama et al. 2008        | NPI               | SPECT         | 26 AD+depression<br>18 AD                                                   | Depression associated with reduced left dorsolateral prefrontal cortex perfusion                                                                                                                                     |
| Ebmeier et al. 1997        | HAM-D             | SPECT<br>MRI  | 22 AD<br>40 Late life depression                                            | AD associated with left temporoparietal hypoperfusion, reduced temporal lobe width re: depression: severity of depression symptoms associated with frontal and basal ganglia hypoperfusion                           |
| Ebmeier et al. 1998        | HAM-D             | SPECT         | 15 AD<br>18 Late life depression<br>21 Early onset depression<br>11 healthy | Late life depression associated with reduced temporal lobe perfusion and periventricular white matter changes re: healthy<br>AD associated with reduced frontal perfusion and deep white matter changes re: healthy. |
| Galynker et al. 2000       | HAM-D             | SPECT         | 25 AD                                                                       | Depression associated with normal perfusion of frontal and cingulate areas                                                                                                                                           |
| Kataoka et al. 2010        | NPI<br>depression | SPECT         | 17 AD+depression<br>18 AD                                                   | Depression associated with L callosomarginal segment of L prefrontal cortex hypoperfusion                                                                                                                            |
| Levy-Cooperman et al. 2008 | CSDD              | SPECT         | 27 AD+depression<br>29 AD                                                   | Depression associated with lower dorsolateral prefrontal cortex and superior prefrontal perfusion                                                                                                                    |
| Oshima et al. 2014         | NPI<br>depression | SPECT         | 57 AD                                                                       | Depression associated with L mid-frontal hypoperfusion                                                                                                                                                               |
| Terada et al. 2014         | NPI<br>depression | SPECT         | 79 AD                                                                       | Depression associated with L middle frontal gyrus (BA9) hypoperfusion                                                                                                                                                |
| Holthoff et al. 2005       | NPI               | PET<br>FDG    | 26 AD<br>10 AD+depression<br>17 AD+apathy                                   | Lower dorsolateral prefrontal cortex metabolism in AD with depression; lower L orbito-frontal metabolism in AD w/ apathy                                                                                             |

|                   |                               |             |                                                                 |                                                                                                                                                                                                                                                                                                                                               |
|-------------------|-------------------------------|-------------|-----------------------------------------------------------------|-----------------------------------------------------------------------------------------------------------------------------------------------------------------------------------------------------------------------------------------------------------------------------------------------------------------------------------------------|
| Lee et al. 2006   | NIMH AD depressive syndrome   | PET<br>FDG  | 12 AD+depression<br>12 AD                                       | Depression associated with lower R sup front gyrus metabolism                                                                                                                                                                                                                                                                                 |
| Lopez et al. 2001 | DSM-IV<br>MDD<br>MDRS<br>MMSE | PET<br>rCBF | 5 AD<br>1 AD+depression<br>1 AD+emotion lability<br>1 AD+apathy | 1 AD+ depression associated with reduced regional cerebral blood flow anterior cingulate & superior temporal cortex bilateral, L dorsolateral prefrontal cortex, R medial temporal cortex, R parietal cortex; 1 AD+apathy associated with reduced regional cerebral blood flow dorsolateral prefrontal cortex, L basal ganglia; all re: 5 AD. |

**Table S2B**  
**Grey and white matter changes in Alzheimer's disease and depression**

| <b>Source</b>         | <b>Dep Scale</b>                                                   | <b>Method</b>     | <b>Subjects</b>                                | <b>Findings</b>                                                                                                                                                                         |
|-----------------------|--------------------------------------------------------------------|-------------------|------------------------------------------------|-----------------------------------------------------------------------------------------------------------------------------------------------------------------------------------------|
| Boccia et al. 2015    | Not Assessed                                                       | MRI meta-analysis | AD<br>Late life depression                     | Hippocampus, posterior cingulate atrophy in AD;<br>Hippocampus, frontal, and precuneate atrophy in late life depression                                                                 |
| Clark et al. 1998     | DSM-III-R MDD;<br>Clinician-rated depression scale<br>sx<br>NEO-PI | MRI               | 31 AD                                          | Nothing re: MD episodes;<br>Depression symptoms associated with anterior white matter hyperintensities                                                                                  |
| Ebmeier et al. 1997   | HAM-D                                                              | SPECT<br>MRI      | 22 AD<br>40 Late life depression               | AD associated with L temporoparietal hypoperfusion, reduced temporal lobe width re: depression; severity of depression symptoms associated with frontal and basal ganglia hypoperfusion |
| Elcombe et al. 2015   | GDS                                                                | MRI               | 218 w/mood or memory complaints                | Depression associated with decreased hippocampal volume                                                                                                                                 |
| Enache et al. 2015    | CSDD or antidepressant use                                         | MRI               | 57 AD<br>42 AD+depression                      | Depression associated with less R medial temporal atrophy                                                                                                                               |
| Geerlings et al. 2012 | CES-D or antidepressant use                                        | MRI               | 630 elderly w/o dementia                       | Depression associated with decreased hippocampal volume, increased white matter hyperintensity.                                                                                         |
| Hu et al. 2015        | NPI depression                                                     | MRI               | 85 AD<br>131 healthy                           | Depression associated with L mid-frontal atrophy                                                                                                                                        |
| Joko et al. 2016      | ICD criteria (unspecified)                                         | MRI               | 58 AD<br>20 Late life depression<br>22 healthy | Late life depression associated with decreased hippocampal volume but not as severe as in AD                                                                                            |
| Lebdev et al. 2013    | MADRS                                                              | MRI               | 23 AD+depression<br>30 AD                      | Depression associated with prefrontal & temporal thinning;<br>Treatment-associated thinning associated with parahippocampal thinning                                                    |

|                        |                                              |     |                                                                        |                                                                                                                                                                |
|------------------------|----------------------------------------------|-----|------------------------------------------------------------------------|----------------------------------------------------------------------------------------------------------------------------------------------------------------|
| Lebdeva et al. 2014    | CSDD<br>GDS                                  | MRI | 189 AD                                                                 | Depression associated with L parietal and temporal thinning                                                                                                    |
| Lind et al. 2006       | Gottfries-Brane-<br>Steen scale              | MRI | 67 AD, FTD, VaD, mixed<br>AD+VaD                                       | NS                                                                                                                                                             |
| Meltzer et al. 1999    | HAM-D                                        | PET | 6 AD<br>3 AD+depression<br>11 LLD<br>10 Controls                       | No 5-HT <sub>2A</sub> binding potential abnormalities.                                                                                                         |
| Morra et al. 2009      | GDS                                          | MRI | 189 AD                                                                 | Depression associated with R hippocampal atrophy                                                                                                               |
| Mueller et al. 2010    | DSM-IV MDD                                   | MRI | 20 AD<br>32 VaD or Vascular micro-<br>cerebral infarcts<br>42 Controls | Depression associated with frontal white matter<br>hyperintensities<br>Cog deterioration associated with grey matter atrophy                                   |
| O'Brien et al. 1996    | MADRS                                        | MRI | 61 AD<br>60 MDD<br>39 Controls                                         | AD associated with periventricular WMH; MDD associated<br>with deep white matter hyperintensities                                                              |
| O'Brien et al. 2000    | MADRS                                        | MRI | 28 AD<br>25 VaD<br>27 LBD<br>26 Controls                               | In all dementia etiologies depression associated with frontal<br>white matter hyperintensities                                                                 |
| Pantel et al. 1997     | HAM-D<br>MADRS                               | MRI | 19 late life depression<br>13 Controls                                 | Depression not associated with cortical atrophy; increased<br>ventricle brain ratio suggests central atrophy                                                   |
| Shimoda et al. 2015    | HAM-D                                        | MRI | 17 late life depression<br>21 AD                                       | Both AD and late life depression associated with mesial<br>temporal and ant cingulate atrophy; AD only associated with<br>post cingulate and precuneus atrophy |
| Son et al. 2013        | GDS                                          | MRI | 14 AD+depression<br>32 AD                                              | Depression associated with L inferotemporal gyrus atrophy                                                                                                      |
| Starkstein et al. 2009 | Depression and<br>Apathy from<br>psych eval. | MRI | 79 AD                                                                  | Depression associated with R parietal white matter<br>hyperintensities; Apathy associated with frontal white matter<br>hyperintensities                        |



|                       |                                      |     |                                                                                                                                                                                                           |                                                                                                                                                                            |
|-----------------------|--------------------------------------|-----|-----------------------------------------------------------------------------------------------------------------------------------------------------------------------------------------------------------|----------------------------------------------------------------------------------------------------------------------------------------------------------------------------|
| Steffens et al. 2002  | DDES (Duke depression eval schedule) | MRI | 115 Late life depression                                                                                                                                                                                  | Decreased L hippocampal volume associated with later AD                                                                                                                    |
| Sturm et al. 2013     | GDS                                  | MRI | 64 AD<br>62 MCI<br>111 Controls                                                                                                                                                                           | Depression not associated with structural changes                                                                                                                          |
| Swann et al. 1997     | MADRS                                | MRI | 5 Controls+Hippocampal atrophy<br>5 Controls- Hippocampal atrophy<br>7 Depression + Hippocampal atrophy<br>7 Depression - Hippocampal atrophy<br>12 AD+ Hippocampal atrophy<br>12 AD- Hippocampal atrophy | Hippocampal atrophy not associated with later cognitive decline                                                                                                            |
| Taylor et al. 2014    | MADRS                                | MRI | 92 LLD<br>70 Controls                                                                                                                                                                                     | Depression associated with decreased hippocampal volume                                                                                                                    |
| Veredelho et al. 2013 | GDS                                  | MRI | 90 Dementia<br>147 MCI<br>(from cohort of 639 healthy)                                                                                                                                                    | Depression and white matter hyperintensities both associated with later decline                                                                                            |
| Wu et al. 2006        | SCID-IV, HAM-D                       | MRI | 11 Late life depression<br>8 Controls                                                                                                                                                                     | Late life depression associated with deep white matter hyperintensities (R anterior thalamus radiation, R uncinate fasciculus, corpus callosum, inferior fronto-occipital) |

**Table S2C**  
**Other neuroimaging modalities in Alzheimer's disease and depression**

| <b>Source</b>               | <b>Dep Scale</b>      | <b>Method</b> | <b>Subjects</b>           | <b>Findings</b>                                                                                                                                              |
|-----------------------------|-----------------------|---------------|---------------------------|--------------------------------------------------------------------------------------------------------------------------------------------------------------|
| Chung et al. 2015<br>(2016) | GDS<br>NPI depression | PET           | 153 AD                    | Depression not associated with cortical amyloid beta                                                                                                         |
| Guo et al. 2015             | HAM-D                 | fMRI          | 15 AD+depression<br>17 AD | Depression associated with decreased regional homogeneity in R precentral gyrus, R superior frontal gyrus, R mid-frontal gyrus, R inferior frontal cortex    |
| Tsai et al. 2013            | GDS                   | MRI/MRS       | 26 AD                     | Depression associated with increased choline/creatine in L dorsolateral prefrontal cortex and increased myoinositol/creatine in cingulate cortex bilaterally |

**Tables 3: Neuroimaging of Alzheimer's disease and psychosis**  
**Abbreviations for Tables 3A – G**

AH = Auditory Hallucinations

BEHAVE-AD = Behavioral Pathology in Alzheimer's Disease

BPSD = behavioral and psychological symptoms of dementia.

CERAD BRSP = Consortium to Establish a Registry for Alzheimer's Disease Behavior Rating Scale for Dementia

CUSPAD = Columbia University Scale for Psychopathology in Alzheimer's Disease

DMI = Delusions of Misidentification

DNOS = Delusions, Not Otherwise Specified

DP = Disintegrative Psychosis

HNOS = Hallucinations, Not Otherwise Specified

NPI = neuropsychological inventory

VH = Visual Hallucinations

**Table S3A**  
**In Vivo Cerebral Atrophy in Patients with Alzheimer's Disease With and without Psychosis**

| Source                | Behavior (Instr.)                   | Imaging method | Design                  | Findings                                                                                                                                                                                                     |
|-----------------------|-------------------------------------|----------------|-------------------------|--------------------------------------------------------------------------------------------------------------------------------------------------------------------------------------------------------------|
| Barber et al., 2001   | DNOS<br>DMI<br>AH<br>VH<br>(CUSPAD) | MR-V           | 22 AD v 26 C            | No assoc. between any psychotic sxs. and any measure of atrophy                                                                                                                                              |
| Bruen et al., 2008    | DNOS                                | MR             | 31 preselected for BPSD | DNOS assoc. with ↓ GM density in:<br>a. R inf F gyrus (BA 45)<br>b. R inf P lobule (BA 40)<br>c. L inf F gyrus (BA 45)<br>d. L med F gyrus (BA 11)<br>e. L claustrum                                         |
| Forstl et al., 1991   | DMI                                 | CT             | 40 AD + P v 88 AD - P   | DMI assoc. with larger ant. horn of R lat. vent.                                                                                                                                                             |
| Geroldi et al., 2000  | DP (NPI)                            | CT             | 19 AD + P v 22 AD - P   | DP assoc. with asymmetry (R>L) of T horns.                                                                                                                                                                   |
| Geroldi et al., 2002  | DP (NPI)                            | CT             | 19 AD + P v 22 AD - P   | 1. DP assoc. with asymmetry (R>L) of T horns<br>2. DP assoc. with asymmetry (L>R) of F horns                                                                                                                 |
| Holroyd et al., 2000  | VH                                  | MR             | 7 AD + P v 7 AD -P      | VH assoc. with ↓ O to whole brain ratio                                                                                                                                                                      |
| Howanitz et al., 1995 | DNOS<br>HNOS                        | MR             | 20 AD +P v 12 AD - P    | 1. HNOS assoc. with:<br>a. Overall atrophy<br>b. R lat. vent. size<br>c. L lat. vent. size<br>2. No assoc. between HNOS and size of T horns or 3rd vent.<br>3. No assoc. between DNOS any measure of atrophy |

|                           |                       |      |                                 |                                                                                                                                                                                                                                                                                                                                                                                         |
|---------------------------|-----------------------|------|---------------------------------|-----------------------------------------------------------------------------------------------------------------------------------------------------------------------------------------------------------------------------------------------------------------------------------------------------------------------------------------------------------------------------------------|
| Serra et al., 2010        | DNOS<br>HNOS<br>(NPI) | MR-V | 27 AD + P v 39 AD -<br>P v 23 C | DNOS assoc. with ↓ grey matter volume in tail of R hippo.                                                                                                                                                                                                                                                                                                                               |
| Whitehead et al.,<br>2012 | DP<br>(NPI)           | MR   | 23 AD + P v 90 AD -<br>P        | <ol style="list-style-type: none"> <li>1. DP in males not assoc. with cortical thickness</li> <li>2. DP in females assoc. with ↓ cortical thickness in: <ol style="list-style-type: none"> <li>a. L F pole</li> <li>b. L med. OFC</li> <li>c. L T pole</li> <li>d. L inf., middle, &amp; sup. T gyri</li> <li>e. R T pole</li> <li>f. R middle &amp; sup. T gyri</li> </ol> </li> </ol> |

**Table S3B**  
**In Vivo White Matter Changes in Patients with Alzheimer's Disease with and without Psychosis**

| Source                 | Behavior (Instr.)                 | Imaging method | Design                                 | Findings                                                                                                                                                                                                                                                             |
|------------------------|-----------------------------------|----------------|----------------------------------------|----------------------------------------------------------------------------------------------------------------------------------------------------------------------------------------------------------------------------------------------------------------------|
| Barber et al., 1999    | DNOS<br>VH<br>AH<br>(CUSPAD)      | MR             | 28 AD v 26 C                           | 1. DNOS assoc. with absence of O WMΔ<br>2. VH assoc. with absence of O WMΔ                                                                                                                                                                                           |
| Howanitz et al., 1995  | DNOS<br>HNOS                      | MR             | 20 AD +P v<br>12 AD - P                | 1. No assoc. between DNOS and WMΔ<br>2. No assoc. between HNOS and WMΔ                                                                                                                                                                                               |
| Lee et al., 2006<br>** | PNOS<br>DMI<br>DP<br>(CERAD BRSD) | MR             | 10 AD + P v<br>45 AD - P               | 1. DMI assoc. with total WMΔ<br>2. DMI assoc. with BL F WMΔ<br>3. DMI assoc. with R P-O WMΔ<br>3 DMI assoc. with L BG WMΔ                                                                                                                                            |
| Lin et al., 2006       | VH                                | MR             | 5 AD + P v 5<br>AD - P                 | 1. VH assoc. with O periventricular caps<br>2. VH not assoc. with O deep WMΔ                                                                                                                                                                                         |
| Lopez et al., 1992     | PD<br>HNOS                        | CT             | Prosp: 22 AD<br>+ WMΔ v 22<br>AD - WMΔ | 1. At outset: 1 AD + WMΔ had PD; 5 AD - WMΔ had PD; At 1y: 7 AD + WMΔ had PD; 5 AD - WMΔ had PD; neither difference was sig.<br>2. At outset: 5 AD + WMΔ had HNOS; 5 AD - WMΔ had HNOS; At 1y: 4 AD + WMΔ had HNOS; 6 AD - WMΔ had HNOS; neither difference was sig. |
| Ogawa et al., 2013     | DNOS<br>HNOS<br>(NPI)             | MR             | 93 AD +<br>WMΔ v 70<br>AD - WMΔ        | WMΔ assoc. with ↑ DNOS                                                                                                                                                                                                                                               |

|                            |      |    |                                 |                           |
|----------------------------|------|----|---------------------------------|---------------------------|
| Starkstein et al.,<br>1997 | DNOS | MR | 15 AD +<br>WMΔ v 23<br>AD – WMΔ | WMΔ not assoc. with DNOS. |
|----------------------------|------|----|---------------------------------|---------------------------|

Note. DNOS = Delusions, Not Otherwise Specified; HNOS = Hallucinations, Not Otherwise Specified; AH = auditory hallucinations; VH = visual hallucinations; DMI = Delusions of Misidentification; DP = Disintegrative Psychosis; NPI = neuropsychological inventory; WMΔ = white matter changes .

\*Re. Binetti et al., 1995: Findings re AD are confounded because patients with delusions were not stratified by diagnosis (AD vs. MID)

\*\*Re. Lee et al, 2006: This group also reported associations between specific delusions and WMH.

**Table S3C**  
**In Vivo Cerebral Blood Flow in Patients with Alzheimer's Disease with and without Psychosis**

| Source                | Behavior                            | Imaging method                      | Design                                                            | Findings                                                                                                                                                                                                                                          |
|-----------------------|-------------------------------------|-------------------------------------|-------------------------------------------------------------------|---------------------------------------------------------------------------------------------------------------------------------------------------------------------------------------------------------------------------------------------------|
| Fukuhara et al., 2001 | DP (theft; NPI)                     | SPECT<br>( <sup>99m</sup> Tc-HMPAO) | 9 AD + P v 9 AD - P                                               | DP assoc. with ↓ rel. CBF R med. post. P region                                                                                                                                                                                                   |
| Kotrla et al., 1995   | DNOS<br>HNOS<br>(BEHAVE-AD)         | SPECT<br>( <sup>99m</sup> Tc-HMPAO) | 29 AD + DNOS v 17<br>AD - DNOS;<br>10 AD + HNOS v 36<br>AD - HNOS | 1. DNOS assoc. with ↓ rel. CBF L F lobe<br>2. HNOS assoc. with ↓ rel. CBF BL P lobes<br>3. HNOS assoc. with ↓ rel. CBF L inf. F lobe                                                                                                              |
| Lee et al., 2009      | DNOS<br>(BEHAVE-AD)                 | SPECT<br>( <sup>99m</sup> Tc-ECD)   | 41 AD v 12 C                                                      | DNOS assoc. with ↓ rel. CBF BL F lobes                                                                                                                                                                                                            |
| Lopez et al., 2001*   | PNOS<br>DNOS<br>HNOS<br>(interview) | <sup>15</sup> O PET                 | 4 AD + P v 5 AD - P                                               | 1. PNOS assoc. with ↓ rel. CBF L med T cortex and L<br>DLPFC<br>2. HNOS assoc. with ↓ rel. CBF R P cortex                                                                                                                                         |
| Matsuoka et al., 2010 | DNOS<br>(NPI)                       | SPECT<br>( <sup>123</sup> I-IMP)    | 14 AD + P v 21 AD - P                                             | DNOS assoc. with ↓ rel. CBF R ant. insula                                                                                                                                                                                                         |
| Mega et al., 2000     | PNOS<br>(NPI)                       | SPECT<br>( <sup>99m</sup> Tc-HMPAO) | 10 AD + P v 10 AD - P                                             | PNOS assoc. with ↓ rel. CBF in:<br>a. L DLPFC (BA 4, 8)<br>b. R DLPFC (BA 4, 6)<br>c. L med. OFC (BA 11)<br>d. R med. F (BA 8)<br>e. L ant CG (BA 32)<br>f. L ventral striatum<br>g. L pulvinar<br>h. L dorsolateral P (BA 40)<br>i. L cerebellum |



|                           |                     |                                     |                                 |                                                                                                                                                                                                                                                                                                                                                                                                                                                                                                              |
|---------------------------|---------------------|-------------------------------------|---------------------------------|--------------------------------------------------------------------------------------------------------------------------------------------------------------------------------------------------------------------------------------------------------------------------------------------------------------------------------------------------------------------------------------------------------------------------------------------------------------------------------------------------------------|
| Moran et al., 2008        | PNOS<br>(BEHAVE-AD) | SPECT<br>( <sup>99m</sup> Tc-HMPAO) | 51 AD + P v 52 AD - P           | <ol style="list-style-type: none"> <li>1. PNOS in females assoc. with ↓ rel. CBF in:             <ol style="list-style-type: none"> <li>a. R inferolat. F (BA 10)</li> <li>b. R inf. T (BA 20)</li> </ol> </li> <li>2. PNOS in males assoc. with ↑ rel. CBF in R striatum</li> <li>3. PNOS in males assoc. with ↓ rel. CBF in:             <ol style="list-style-type: none"> <li>a. B/L med. F (BA 10)</li> <li>b. R sup. F (BA 8)</li> <li>c. R P (BA 7)</li> <li>d. L O (BA 18)</li> </ol> </li> </ol>    |
| Nakano et al., 2006       | DNOS<br>(NPI)       | SPECT<br>( <sup>99m</sup> Tc-ECD)   | 25 AD + P v 39 AD - P<br>v 76 C | <ol style="list-style-type: none"> <li>1. AD + DNOS v controls:<br/>DNOS assoc. with ↓ rel. CBF in B/L F lobes</li> <li>2. AD + DNOS v AD - DNOS:<br/>DNOS assoc. with ↓ rel. CBF in:             <ol style="list-style-type: none"> <li>a. R PFC</li> <li>b. R inf. to middle T cortex</li> <li>c. R inf P lobule</li> </ol> </li> </ol>                                                                                                                                                                    |
| Nakatsuka et al.,<br>2013 | DNOS<br>(BEHAVE-AD) | SPECT<br>( <sup>99m</sup> Tc-ECD)   | 27 AD + P v 33 AD - P           | <ol style="list-style-type: none"> <li>1. D of theft assoc. with ↓ rel. CBF in:             <ol style="list-style-type: none"> <li>a. B/L T poles</li> <li>b. R inf. T gyrus</li> </ol> </li> <li>2. Suspiciousness assoc. ↓ rel. CBF in B/L T poles</li> <li>3. D of abandonment assoc. with ↓ rel. CBF in:             <ol style="list-style-type: none"> <li>a. R para hippo. gyrus</li> <li>b. R Post. insula</li> </ol> </li> <li>4. D "house not home" assoc. with ↓ rel. CBF in R amygdala</li> </ol> |

|                            |                                      |                                                         |                                                          |                                                                                                                                                                                                                                                                                                                                                                                                                                                                                                                                                                                                                                                                                                                                                                                                    |
|----------------------------|--------------------------------------|---------------------------------------------------------|----------------------------------------------------------|----------------------------------------------------------------------------------------------------------------------------------------------------------------------------------------------------------------------------------------------------------------------------------------------------------------------------------------------------------------------------------------------------------------------------------------------------------------------------------------------------------------------------------------------------------------------------------------------------------------------------------------------------------------------------------------------------------------------------------------------------------------------------------------------------|
| Nomura et al., 2012<br>**  | DNOS<br>(NPI)                        | SPECT<br>( <sup>123</sup> I-IMP)                        | 25 AD + P<br>(preselected)                               | <ol style="list-style-type: none"> <li>1. "Factor1" (House not home; people not who they claim to be; phantom boarder; abandonment) assoc. with: <ol style="list-style-type: none"> <li>a. ↓ rel. CBF in R middle T gyrus</li> <li>b. ↑ rel. CBF in L med. F gyrus (BA 6), L precentral gyrus (BA 4)</li> </ol> </li> <li>2. "Factor2" (TV sign, persecution) assoc. with: <ol style="list-style-type: none"> <li>a. ↓ rel. CBF in B/L precuneus (BA 31, 7)</li> <li>b. ↑ rel. CBF in L insula, R TH, R F subgyrus</li> </ol> </li> <li>3. "Factor 3" (abandonment and jealousy) assoc. with: <ol style="list-style-type: none"> <li>a. ↓ rel. CBF in R inf. T (BA 20), R inf. F (BA 10)</li> <li>b. ↑ rel. CBF in L middle F gyrus, L insula, L putamen, L post. CG (BA31)</li> </ol> </li> </ol> |
| Ponton et al., 1995<br>*** | DNOS<br>(NR)                         | SPECT<br>( <sup>99m</sup> Tc-HMPAO & <sup>133</sup> Xe) | 15 AD - P                                                | <ol style="list-style-type: none"> <li>1. Baseline: DNOS assoc. with ↓ rel. CBF in: <ol style="list-style-type: none"> <li>a. B/L sup. T gyrus (BA 19)</li> <li>b. R inf. T gyrus</li> </ol> </li> <li>2. At 1 y: DNOS not assoc. with CBF</li> </ol>                                                                                                                                                                                                                                                                                                                                                                                                                                                                                                                                              |
| Staff et al., 1999         | DNOS<br>(semi-structured assessment) | SPECT<br>( <sup>99m</sup> Tc-HMPAO)                     | 18 AD + P v 15 AD - P                                    | ROI analysis: DNOS assoc. with ↓ rel. CBF in R F, P, T & "limbic" lobes                                                                                                                                                                                                                                                                                                                                                                                                                                                                                                                                                                                                                                                                                                                            |
| Staff et al., 2000<br>**** | DNOS                                 | SPECT<br>( <sup>99m</sup> Tc-HMPAO)                     | 10 AD + CSAD v 15 AD + NCSAD v 20 AD - P<br>see footnote | SPM analysis: <ol style="list-style-type: none"> <li>a. CSAD v AD - P: CSAD assoc. with ↓ rel. CBF in R F (Part of BA 9)</li> <li>b. CSAD v AD + NCSAD: CSAD assoc. with ↓ rel. CBF in R F (Part of BA 9)</li> </ol>                                                                                                                                                                                                                                                                                                                                                                                                                                                                                                                                                                               |
| Starkstein et al., 1994    | DNOS                                 | SPECT<br>( <sup>99m</sup> Tc-HMPAO)                     | 16 AD + P v 29 AD - P                                    | DNOS assoc. with ↓ rel. CBF in B/L inf. and sup. T lobes                                                                                                                                                                                                                                                                                                                                                                                                                                                                                                                                                                                                                                                                                                                                           |
| Starkstein et al., 1997    | DNOS<br>(Dementia Psychosis Scale)   | SPECT<br>( <sup>99m</sup> Tc-HMPAO)                     | 15 AD + WMΔ v 23 AD - WMΔ                                | CBF not assoc. with DNOS.                                                                                                                                                                                                                                                                                                                                                                                                                                                                                                                                                                                                                                                                                                                                                                          |

\*Re. Lopez et al., 2001: One pt. with DNOS had ↑rel CBF in R TH, the other had ↑rel CBF in L TH. One pt with HNOS had ↑rel CBF in R BG and TH; the other pt. with HNOS had ↑rel CBF in R ant. CG, R OFC, and B/L BG.

\*\*Re. Nomura et al, 2012: This study is unique (and not actually controlled) in having started with preselected delusional AD patients, divided them according to novel delusional "types" determined by factor analysis, and comparing CBF between those delusional types.

\*\*\*Re. Ponton et al., 1995: Prospective longitudinal study with 1 y follow-up. None of the subjects had delusions at the outset. 6 developed delusions.

"Baseline" findings for the delusional subgroup are retrospective.

\*\*\*\*Re. Staff et al., 2000: The 45 AD subjects included 10 with the content specific autobiographical delusion that a family member was still alive (CSAD); 15 with other delusions (NCSAD), and 20 without delusions.

**Table S3D**  
**In Vivo Cerebral Metabolism in Patients with Alzheimer's Disease with and without Psychosis**

| Source                                                                                                                                                                                        | Behavior                | Imaging method        | Design                      | Findings                                                                                                                                                                                                                                                                                                                                                                                        |
|-----------------------------------------------------------------------------------------------------------------------------------------------------------------------------------------------|-------------------------|-----------------------|-----------------------------|-------------------------------------------------------------------------------------------------------------------------------------------------------------------------------------------------------------------------------------------------------------------------------------------------------------------------------------------------------------------------------------------------|
| Hirono et al., 1998                                                                                                                                                                           | DNOS<br>(BPADRS or NPI) | <sup>18</sup> FDG PET | 26 AD + P v 39 - P          | 1. DNOS assoc. with ↑ CMRglu in L ant. T gyrus<br>2. DNOS assoc. with ↓ CMRglu in L med. O region                                                                                                                                                                                                                                                                                               |
| Mentis et al., 1995                                                                                                                                                                           | DMI                     | <sup>18</sup> FDG PET | 9 AD + P v 15 - P v<br>17 C | 1. ROI data: DMI assoc. with ↓ CMRglu in:<br>a. B/L OFC<br>b. L post. med. T<br>c. L ant. CG<br>d. B/L post CG<br>e. L caudate nuc<br>f. L lentiform nuc<br>L calcarine<br>2. Statistical parametric mapping data:<br>DMI assoc. with ↓ CMRglu in:<br>a. B/L OFC<br>b. B/L ant. CG<br>(BA 10, 11, 32, 25)<br>DMI assoc. with ↑ CMRglu in:<br>a. B/L sup. T<br>b. B/L inf. P<br>c. B/L precuneus |
| Sultzer et al., 1995 *                                                                                                                                                                        | PNOS                    | <sup>18</sup> FDG PET | 21 AD<br>see footnote       | PNOS assoc. with ↓ CMRglu in B/L F lobes                                                                                                                                                                                                                                                                                                                                                        |
| Note. DNOS = Delusions, Not Otherwise Specified; BPADRS = Behavioral Pathology in Alzheimer's Disease Rating Scale; NPI = neuropsychological inventory; DMI = Delusions of Misidentification; |                         |                       |                             |                                                                                                                                                                                                                                                                                                                                                                                                 |

\* Re. Sultzer et al., 1995: This study does not report how many subjects exhibited psychosis. It reports correlations between psychosis scores and metabolism.

**Table S3E**  
**Other imaging studies in Patients with Alzheimer's Disease With and without Psychosis**

| <b>Source</b>           | <b>Behavior</b>     | <b>Imaging method</b>                     | <b>Design</b>                       | <b>Findings</b>                                                                                  |
|-------------------------|---------------------|-------------------------------------------|-------------------------------------|--------------------------------------------------------------------------------------------------|
| Forstl et al.,<br>1992b | DNOS<br>(interview) | CT                                        | 5 AD with<br>BGM vs 5 AD<br>without | DNOS assoc. with BGM                                                                             |
| Reeves et al.,<br>2009  | DNOS<br>(NPI)       | [ <sup>11</sup> C]raclopride<br>[RAC] PET | 7 AD +P v 16<br>AD - P              | DNOS assoc. with ↑ [ <sup>11</sup> C]RAC BPND (binding potential of striatal DA D2/D3 receptors) |
| Shinno et al.,<br>2007  | DNOS<br>(BEHAVE-AD) | <sup>1</sup> H MRS                        | 8 AD +P v 22<br>AD - P              | 1. DNOS assoc. with ↓ NAA/Cr in ant. CG<br>2. DNOS assoc. with ↑ mI/Cr in ant. CG                |

**Table 4: Neuroimaging of Alzheimer's disease and anxiety  
Abbreviations for Table 4**

**BEHAVIOR**

NPI = Neuropsychiatric Inventory

BPSD = Behavioral and Psychological Symptoms of Dementia

MMSE = Mini-mental State Examination

OCD = Obsessive Compulsive Disorder

**METHOD**

MRI = Magnetic Resonance Imaging

PET = Positron Emission Tomography

FDG-PET = 2-[<sup>18</sup>F]fluoro-2-deoxy-D-glucose (FDG)- Positron Emission Tomography

SPECT = Single Photon Emission Computed Tomography

WMH = White Matter Intensities

**DESIGN**

AD = Alzheimer's Disease

**Table 4:**  
**Neuroimaging studies of in Patients with Anxiety and Alzheimer's Disease**

| <b>Source</b>               | <b>Behavior</b>                                                           | <b>Method</b>     | <b>Design</b>                                                   | <b>Findings</b>                                                                                                                                     |
|-----------------------------|---------------------------------------------------------------------------|-------------------|-----------------------------------------------------------------|-----------------------------------------------------------------------------------------------------------------------------------------------------|
| Berlow et al. 2010          | NPI anxiety<br>Other BPSD<br>MMSE                                         | MRI WMH<br>volume | 37 AD                                                           | WMH volume associated with NPI anxiety and other BPSD                                                                                               |
| Hashimoto et al.,<br>2006   | NPI anxiety<br>(frequency x<br>severity)                                  | 18 FDG PET        | 41 AD                                                           | Anxiety associated with lower metabolism in bilateral entorhinal cortex, anterior parahippocampal gurus, left superior temporal gyrus, left insula. |
| Horenik et al.,<br>2006     | NPI anxiety<br>MMSE                                                       | MRI               | 27 AD<br>15 healthy controls                                    | No correlation of amygdala volume with NPI anxiety (or any other NPI score) MMSE score correlated with absolute amygdala volume                     |
| Marksteiner et al.,<br>2003 | OCD                                                                       | MRI<br>SPECT      | 1 AD<br>5 healthy controls                                      | Cerebral atrophy esp. temporal lobes, reduced temporal lobe rCBF                                                                                    |
| Poulin et al., 2011         | NPI anxiety                                                               | MRI               | 174 AD<br>193 healthy<br>controls                               | Amygdala atrophy not significantly related to NPI anxiety                                                                                           |
| Serra et al., 2010          | NPI anxiety                                                               | MRI               | 19 aMCI<br>15 early AD<br>12 moderate AD<br>23 healthy controls | Anxiety unrelated to gray matter atrophy anywhere in the brain                                                                                      |
| Sultzer et al., 1995        | Neurobehavioral<br>Rating Scale<br>Anxiety/<br>Depression factor<br>score | 18 FDG PET        | 21 AD                                                           | Anxiety/Depression factor score related to parietal lobe hypometabolism                                                                             |

## Ovid MEDLINE Pilot Search Algorithms and Results

(aggression.mp. or exp Aggression/)+ (Alzheimer Disease/ or alzheimers.mp.) + (exp Magnetic Resonance Imaging/ or exp Tomography, X-Ray Computed/ or computed tomography.mp. or exp Positron-Emission Tomography/ or exp Tomography, Emission-Computed, Single-Photon/ or exp Magnetic Resonance Spectroscopy/)

Result = 13 citations

agitation.mp. + (exp Alzheimer Disease/ or alzheimers.mp.) + (exp Magnetic Resonance Imaging/ or exp Tomography, X-Ray Computed/ or computed tomography.mp. or exp Positron-Emission Tomography/ or exp Tomography, Emission-Computed, Single-Photon/ or exp Magnetic Resonance Spectroscopy/)

Result = 14 citations

(exp Anxiety/ or anxiety.mp.) + (exp Alzheimer Disease/ or alzheimers.mp.) + (exp Magnetic Resonance Imaging/ or exp Tomography, X-Ray Computed/ or computed tomography.mp. or exp Positron-Emission Tomography/ or exp Tomography, Emission-Computed, Single-Photon/ or exp Magnetic Resonance Spectroscopy/)

Result = 41 citations

(apathy.mp. or exp Apathy/) + (exp Alzheimer Disease/ or alzheimers.mp.) + (exp Magnetic Resonance Imaging/ or exp Tomography, X-Ray Computed/ or computed tomography.mp. or exp Positron-Emission Tomography/ or exp Tomography, Emission-Computed, Single-Photon/ or exp Magnetic Resonance Spectroscopy/)

Result = 53 citations

(exp Depression/ or depression.mp.) + (exp Alzheimer Disease/ or alzheimers.mp.) + (exp Magnetic Resonance Imaging/ or exp Tomography, X-Ray Computed/ or computed tomography.mp. or exp Positron-Emission Tomography/ or exp Tomography, Emission-Computed, Single-Photon/ or exp Magnetic Resonance Spectroscopy/)

Result = 211 citations

Note: since the term “depression” has many meanings in medical science, we determined that this search algorithm overestimated the pertinent literature. The search was repeated adding the qualifier AND (mood.mp or mood disorder.mp. or exp Mood Disorders/)

Result = 75 citations

(euphoria.mp. or exp Euphoria/ or mania.mp.) + (exp Alzheimer Disease/ or alzheimers.mp.) + (exp Magnetic Resonance Imaging/ or exp Tomography, X-Ray Computed/ or computed tomography.mp. or exp Positron-Emission Tomography/ or exp Tomography, Emission-Computed, Single-Photon/ or exp Magnetic Resonance Spectroscopy/)

Result = 2 citations



hyperactivity.mp. + (exp Alzheimer Disease/ or alzheimers.mp.) + (exp Magnetic Resonance Imaging/ or exp Tomography, X-Ray Computed/ or computed tomography.mp. or exp Positron-Emission Tomography/ or exp Tomography, Emission-Computed, Single-Photon/ or exp Magnetic Resonance Spectroscopy/)

Result = 18 citations

(exp Psychotic Disorders/ or psychosis.mp.) + (exp Alzheimer Disease/ or alzheimers.mp.) + (exp Magnetic Resonance Imaging/ or exp Tomography, X-Ray Computed/ or computed tomography.mp. or exp Positron-Emission Tomography/ or exp Tomography, Emission-Computed, Single-Photon/ or exp Magnetic Resonance Spectroscopy/)

Result = 25 citations

(exp Wandering Behavior/ or wandering.mp.) + (exp Alzheimer Disease/ or alzheimers.mp.) + (exp Magnetic Resonance Imaging/ or exp Tomography, X-Ray Computed/ or computed tomography.mp. or exp Positron-Emission Tomography/ or exp Tomography, Emission-Computed, Single-Photon/ or exp Magnetic Resonance Spectroscopy/)

Result = 3 citations

(exp Sleep/ or sleep.mp. or sleep disorder.mp. or exp Sleep Disorders/) + (exp Alzheimer Disease/ or alzheimers.mp.) + (exp Magnetic Resonance Imaging/ or exp Tomography, X-Ray Computed/ or computed tomography.mp. or exp Positron-Emission Tomography/ or exp Tomography, Emission-Computed, Single-Photon/ or exp Magnetic Resonance Spectroscopy/)

Result = 34 citations
