# Supplementary material for: Noncognitive Behavioral Changes Associated With Alzheimer’s Disease: Implications of Neuroimaging Findings
Source: Atypon-hosted journal article supplement (doi:10.1176/appi.neuropsych.16080155), 2017-09-06
Supplement: appi.neuropsych.16080155.ds001.pdf [file appi.neuropsych.16080155.ds001.pdf]

 


Psychiatry Online
